# Supplementary material
Source: Springer Nature journal article supplement (https://mijn.bsl.nl/resource/supplementary/13047_2009_109_MOESM3_ESM.pdf/7109834)



Navicular height  
 $H$  (mm)

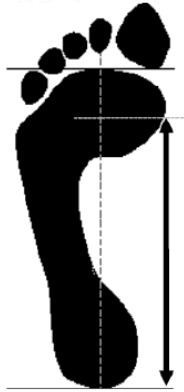

Truncated foot length  
 $L$  (mm)

Supplement: MOESM3 [file 7109834]
